# Supplementary material for: Study of MicroRNAs Related to the Liver Regeneration of the Whitespotted Bamboo Shark, Chiloscyllium plagiosum
Source: Biomed Res Int. 2013 Sep 17;2013:795676. doi: 10.1155/2013/795676 (PMC3789328; doi:10.1155/2013/795676)
Supplement: Supplementary file 1 — Supplementary Table 1 is about the information on all of miRNAs, which contains the miRNAs' names, sequences, genome IDs, read numbers et al. Supplementary Table 2 is about the analysis of miRNA gene cluster. It contains 34 clusters in the Callorhinchus milii genome, of which 16 clusters were generated from the 16 pre-miRNAs, and 2 mature miRNAs were cleaved from each pre-miRNA. Supplementary Table 3 is about the information of miRNA and its target genes related to liver regeneration, which contains forty-six miRNAs were related to cell proliferation and growth terms. [file 795676.f1.xls]

## Sheet: table1
Information on all of miRNAs
miR_name	miR_seq	genomeID	LN	LR24	Log2 (LR24/LN)	dG	CG%	MFEI	group
fru-miR-26	TTCAAGTAATCCAGGATAGGCT	AAVX01037532.1	217146	223179	0.04	-27.6	47	0.9	gp1b
ola-miR-143_R+1	TGAGATGAAGCACTGTAGCTC	AAVX01064725.1	139120	143499	0.04	-28.6	52.4	0.9	gp1b
fru-miR-142a_L+2R-2	TCCATAAAGTAGAAAGCACTA	AAVX01306460.1	53805	102133	0.92	-45.3	42.4	1.3	gp1b
fru-miR-30d_R-6	TGTAAACATCCCCGAC	AAVX01365666.1	73432	62063	-0.24	-26.7	50	0.8	gp1b
fru-miR-126	TCGTACCGTGAGTAATAATGC	AAVX01058805.1	21418	33545	0.65	-22.4	43.9	0.8	gp1b
fru-miR-7_R+3	TGGAAGACTAGTGATTTTGTTGTT	AAVX01096348.1	25019	29540	0.24	-39.1	41.8	1	gp1b
hsa-miR-10a-5p_R-1	TACCCTGTAGATCCGAATTTGT	AAVX01627291.1	25972	26981	0.05	-37.4	40.9	1	gp1b
fru-let-7e_2ss12AG16AT	TGAGGTAGTAGGTTGTATAGTT	AAVX01108779.1	24112	25628	0.09	-34.7	41.4	1	gp1b
xtr-miR-125b	TCCCTGAGACCCTAACTTGTGA	AAVX01166684.1	18435	16103	-0.2	-28	48.8	0.7	gp1b
fru-miR-181a_R-1	AACATTCAACGCTGTCGGTGAG	AAVX01605662.1	12274	12621	0.04	-23.6	47.1	0.7	gp1b
fru-miR-24-3p_R-2	TGGCTCAGTTCAGCAGGAAC	AAVX01198958.1	11885	11885	0	-25.2	49.3	0.7	gp1b
ola-miR-199a-3p	ACAGTAGTCTGCACATTGGTTA	AAVX01256932.1	13904	11628	-0.26	-37.5	48.9	0.8	gp1b
ola-miR-144_L-1R+2_1ss12TA	GGATATCATCATATACTGTAAGT	AAVX01587350.1	5784	9199	0.67	-18.3	33.3	0.9	gp1b
ola-miR-140-3p_L+1R+1	TACCACAGGGTAGAACCACGGA	AAVX01038725.1	8873	8444	-0.07	-37.7	51.2	0.9	gp1b
fru-miR-199_R-1	CCCAGTGTTCAGACTACCTGTT	AAVX01256932.1	10101	7204	-0.49	-37.5	48.9	0.8	gp1b
fru-miR-23b_R-1	ATCACATTGCCAGGGATTACC	AAVX01114775.1	8814	7145	-0.3	-26.2	45.8	0.8	gp1b
fru-miR-144_R-1	TACAGTATAGATGATGTAC	AAVX01587350.1	2235	6606	1.56	-18.3	33.3	0.9	gp1b
fru-miR-27b_R-1	TTCACAGTGGCTAAGTTCTGC	AAVX01114775.1	5997	5251	-0.19	-41.5	47.6	1.1	gp1b
fru-miR-128_R-1	TCACAGTGAACCGGTCTCTTT	AAVX01050759.1	5451	4913	-0.15	-26.7	56.9	0.7	gp1b
hsa-miR-142-3p_R-1	TGTAGTGTTTCCTACTTTATGG	AAVX01306460.1	2435	2982	0.29	-45.3	42.4	1.3	gp1b
fru-miR-17_R+1	CAAAGTGCTTACAGTGCAGGTAG	AAVX01531971.1	2136	1863	-0.2	-25.5	38.2	0.9	gp1b
ola-miR-103_R+2	AGCAGCATTGTACAGGGCTATGA	AAVX01046194.1	2418	1665	-0.54	-33	50	0.9	gp1b
fru-miR-181b_R+1	AACATTCATTGCTGTCGGTGGGT	AAVX01605662.1	1385	1314	-0.08	-31.4	44.6	0.8	gp1b
fru-miR-140	CAGTGGTTTTACCCTATGGTAG	AAVX01038725.1	1369	1204	-0.19	-37.7	51.2	0.9	gp1b
ola-miR-29b_R-2	TAGCACCATTTGAAATCAGT	AAVX01078214.1	971	1006	0.05	-28.3	42.7	0.9	gp1b
ola-miR-1388-3p_R+5	ATCTCAGGTTCGTCAGCCCATGA	AAVX01069536.1	1135	922	-0.3	-19.9	45.3	0.7	gp1b
xtr-miR-126-5p	CATTATTACTTTTGGTACGCG	AAVX01058805.1	412	789	0.94	-22.4	43.9	0.8	gp1b
xtr-miR-30a-3p	CTTTCAGTCAGATGTTTGCAGC	AAVX01474940.1	796	753	-0.08	-33.1	53.7	0.9	gp1b
fru-miR-107_R-1	AGCAGCATTGTACAGGGCTATC	AAVX01541574.1	784	748	-0.07	-23.2	44.9	0.7	gp1b
fru-miR-204a	TTCCCTTTGTCATCCTATGCCT	AAVX01052255.1	988	603	-0.71	-33	48.8	0.8	gp1b
xtr-miR-29c_R+2	TAGCACCATTTGAAATCGGTTA	AAVX01078214.1	422	487	0.21	-31.4	41.7	1	gp1b
fru-miR-130_R-2	CAGTGCAATATTAAAAGGGC	AAVX01105962.1	356	441	0.31	-28.4	45.8	0.9	gp1b
fru-miR-200a	TAACACTGTCTGGTAACGATGT	AAVX01056733.1	346	204	-0.76	-25.8	41.3	0.8	gp1b
xtr-miR-338_R-1	TCCAGCATCAGTGATTTTGTT	AAVX01041385.1	145	163	0.17	-23	42.4	0.9	gp1b
xtr-miR-34a_R-1	TGGCAGTGTCTTAGCTGGTTGT	AAVX01252978.1	228	163	-0.48	-38.8	49.5	0.8	gp1b
hsa-miR-143-5p_R-1	GGTGCAGTGCTGCATCTCTGG	AAVX01064725.1	186	155	-0.26	-28.6	52.4	0.9	gp1b
hsa-miR-454-3p	TAGTGCAATATTGCTTATAGGGT	AAVX01021344.1	140	144	0.03	-25.8	41.5	1	gp1b
hsa-let-7b-3p_R-1	CTATACAACCTACTGCCTTCC	AAVX01031590.1	85	124	0.54	-38.8	45.2	1	gp1b
fru-let-7b_R-7	TGAGGTAGTAGGTTG	AAVX01031590.1	108	111	0.04	-38.8	45.2	1	gp1b
fru-miR-183_R-1	TATGGCACTGGTAGAATTCACT	AAVX01005658.1	116	99	-0.23	-38	41.8	1	gp1b
ola-let-7a-3p_2ss9CT10TC	CTATACAATCTACTGTCTTTC	AAVX01586337.1	73	95	0.39	-42.9	43.6	1	gp1b
fru-miR-96_R-2	TTTGGCACTAGCACATTTTTG	AAVX01227232.1	58	70	0.27	-31.9	36	1	gp1b
hsa-miR-27b-5p_L+1	CAGAGCTTAGCTGATTGGTGAAC	AAVX01114775.1	55	68	0.32	-41.5	47.6	1.1	gp1b
fru-miR-9_R-2	TCTTTGGTTATCTAGCTGTAT	AAVX01065791.1	58	58	-0.01	-22.6	36.4	0.9	gp1b
ola-miR-30d-3p_R-3_1ss10TA	CTTTCAGTCAGATGTTTGC	AAVX01365666.1	30	47	0.64	-26.7	50	0.8	gp1b
fru-mir-24-1-p5_2ss13AG17GA	TGTGCCTACTGAGCTGATAT	AAVX01198958.1	53	46	-0.21	-25.2	49.3	0.7	gp1b
fru-miR-133_L-1R+1	TTGGTCCCCTTCAACCAGCTGT	AAVX01020289.1	27	42	0.62	-35.7	43.8	0.8	gp1b
xtr-miR-30a-5p_R-6	TGTAAACATCCTCGAC	AAVX01474940.1	32	38	0.25	-33.1	53.7	0.9	gp1b
ola-miR-1388-5p_R-1	AGGACTGTCCAACCTGAGAAT	AAVX01069536.1	27	38	0.48	-19.9	45.3	0.7	gp1b
fru-miR-184_R-1	TGGACGGAGAACTGATAAGG	AAVX01446026.1	38	37	-0.04	-24.4	47.1	0.7	gp1b
fru-miR-218a	TTGTGCTTGATCTAACCATGTG	AAVX01277185.1	16	22	0.41	-31.1	43.5	0.8	gp1b
mmu-miR-101b-3p_R+1	TACAGTACTGTGATAGCTGAAG	AAVX01090491.1	23	20	-0.21	-41.3	45.3	1.1	gp1b
fru-miR-190	TGATATGTTTGATATATTAGGT	AAVX01390928.1	13	20	0.61	-23	32.1	0.9	gp1b
fru-miR-203	GTGAAATGTTTAGGACCACTTG	AAVX01190147.1	33	18	-0.89	-22.1	38.1	0.9	gp1b
xtr-miR-301	CAGTGCAATAGTATTGTCAAAGC	AAVX01341167.1	10	18	0.85	-20.3	45	0.8	gp1b
hsa-miR-125b-1-3p	ACGGGTTAGGCTCTTGGGAGCT	AAVX01166684.1	11	17	0.59	-28	48.8	0.7	gp1b
mmu-mir-1187-p5	CACACACACACACACACA	AAVX01231564.1	7	10	0.45	-26.9	32.1	1.6	gp1b
xtr-miR-138_R+6	AGCTGGTGTTGTGAATCAGGCCG	AAVX01130926.1	12	10	-0.3	-29.5	55.1	0.8	gp1b
xtr-miR-135	TATGGCTTTTTATTCCTATGTGA	AAVX01101128.1	8	9	0.04	-28.5	38	1.1	gp1b
hsa-miR-129-1-3p_1ss20TC	AAGCCCTTACCCCAAAAAGCAT	AAVX01173776.1	4	9	1.28	-26.6	48	0.7	gp1b
mmu-miR-466i-5p_L-4	TGTGTGTGTGTGTGTG	AAVX01358598.1	2	5	1.13	-17.2	24.5	1.4	gp1b
hsa-miR-10a-3p_R-3	CAAATTCGTATCTAGGGGA	AAVX01627291.1	6	5	-0.21	-37.4	40.9	1	gp1b
ola-miR-9a-3p_L-1R+2	TAAAGCTAGATAACCGAAAGTA	AAVX01065791.1	1	5	2.79	-22.6	36.4	0.9	gp1b
ola-miR-1-3p_R+1_1ss1TN	NGGAATGTAAAGAAGTATGTAT	AAVX01149879.1	5	5	0.21	-23.3	35.6	0.9	gp1b
hsa-miR-205-5p_R+1	TCCTTCATTCCACCGGAGTCTGT	AAVX01642942.1	8	5	-0.86	-24.6	49.2	0.8	gp1b
fru-miR-129_R-1	CTTTTTGCGGTCTGGGCTTGC	AAVX01173776.1	6	5	-0.21	-26.6	48	0.7	gp1b
hsa-miR-7-1-3p_R-1_1ss17GC	CAACAAATCACAGTCTCCCAT	AAVX01096348.1	4	4	0.06	-39.1	41.8	1	gp1b
fru-miR-122_R+1	TGGAGTGTGACAATGGTGTTTGT	AAVX01098255.1	5	3	-0.79	-24.8	37.1	1.1	gp1b
hsa-miR-26a-1-3p_R-6_1ss11GA	CCTATTCTTGATTACT	AAVX01037532.1	2	3	0.79	-27.6	47	0.9	gp1b
fru-miR-196a_R-1	TAGGTAGTTTCATGTTGTTGG	AAVX01058829.1	3	3	-0.21	-39	41.7	0.9	gp1b
hsa-miR-203_R-6	GTGAAATGTTTAGGAC	AAVX01234553.1	3	3	0.31	-25.3	42.3	0.8	gp1b
hsa-miR-103a-2-5p_R+1	AGCTTCTTTACAGTGCTGCCTTGT	AAVX01197460.1	5	3	-1.01	-23.7	45.5	0.7	gp1b
fru-miR-124_R-3	TAAGGCACGCGGTGAATGC	AAVX01233922.1	2	2	0.06	-27.3	45.7	0.9	gp1b
	TAAGGCACGCGGTGAATGC	AAVX01073976.1	2	2		-32.3	52.3	0.7	gp1b
fru-mir-200a-p5_2ss9CT10CA	CATCTTACTAGACAGTGCTGGA	AAVX01056733.1	5	1	-2.01	-25.8	41.3	0.8	gp1b
ola-miR-133-5p_R-3	AGCTGGTAAAATGGAACCAA	AAVX01020289.1	2	1	-0.21	-35.7	43.8	0.8	gp1b
mmu-miR-107-5p	AGCTTCTTTACAGTGTTGCCTTG	AAVX01541574.1	5	1	-1.79	-23.2	44.9	0.7	gp1b
ola-miR-126-3p_R+2	TCGTACCGTGAGTAATAATGCA	AAVX01058805.1	29228	39751	0.44	-37.2	48.3	0.7	gp2a
fru-miR-30b	TGTAAACATCCTACACTCAGCT	AAVX01020176.1	5338	4690	-0.19	-30.8	46.2	0.7	gp2a
fru-miR-92_R-2	TATTGCACTTGTCCCGGCCT	AAVX01075480.1	2536	2786	0.14	-24.6	44.4	0.9	gp2a
mmu-miR-155-5p_R-2	TTAATGCTAATTGTGATAGGG	AAVX01187381.1	1938	1941	0	-28.6	42.2	0.8	gp2a
hsa-let-7d-5p	AGAGGTAGTAGGTTGCATAGTT	AAVX01008163.1	1381	1383	0	-44	50.6	1	gp2a
ola-miR-27d-3p_R+2	TTCACAGTGGCTAAGTTCCG	AAVX01257813.1	1419	1057	-0.42	-42.8	51.1	0.9	gp2a
xla-miR-15c_R-2	TAGCAGCACATCATGGTTTG	AAVX01142701.1	218	246	0.18	-31.3	48.3	0.7	gp2a
xtr-miR-15a_R-1	TAGCAGCACATAATGGTTTGT	AAVX01075355.1	140	149	0.08	-35.2	40.6	0.9	gp2a
ola-miR-24b-5p_R-2	TGCCTACTGAGCTGATAACA	AAVX01198958.1	112	88	-0.34	-45.5	48.4	1	gp2a
fru-miR-25_R-3	CATTGCACTTGTCTCGGTC	AAVX01075480.1	42	70	0.74	-37.4	55.7	0.8	gp2a
xtr-let-7f	TGAGGTAGTAGATTGTATAGTT	AAVX01156403.1	14	14	0.08	-42.6	43.8	1	gp2a
mmu-mir-5097-p3	TCTGAGGGTCCAGGGT	AAVX01141767.1	2	9	2.02	-25.9	45.7	0.7	gp2a
	TCTGAGGGTCCAGGGT	AAVX01197671.1	2	9		-25.9	45.7	0.7	gp2a
hsa-miR-200b-5p_L-1R-4	ATCTTACTGGGCAGCAT	AAVX01012727.1	7	7	-0.05	-32.7	39.5	1.1	gp2a
fru-miR-132_R-2	TAACAGTCTACAGCCATGGT	AAVX01086956.1	2	4	1.38	-29.1	44.9	0.9	gp2a
fru-miR-365_R-4	TAATGCCCCTAAAAATCC	AAVX01470594.1	2	4	0.79	-22.5	34.8	0.7	gp2a
PC-3p-7_141620	TGAGATGAAGCACTGTAGCTCT	AAVX01064725.1	74264	60699	-0.29	-39.9	50.6	0.9	gp4a
PC-5p-16_103922	AGGACTGTCTAACCTGAGAAT	AAVX01069536.1	80662	56337	-0.52	-35.5	45.6	0.9	gp4a
PC-5p-93_24510	TGTAAACATCTTTAACTGAAAGCT	AAVX01239023.1	24369	37458	0.62	-18.9	26.9	1	gp4a
PC-5p-127_17238	AAACGGAACCCCAAAAGTAGCT	AAVX01449279.1	12696	15680	0.3	-49.3	52.5	0.9	gp4a
PC-3p-189_12178	TATTGCACTTGTCCCGGCCTAT	AAVX01075480.1	7573	7566	0	-24.6	44.8	0.8	gp4a
PC-5p-290_7683	AAAAGTGCTTGTAGTGCAGGTAG	AAVX01072278.1	7749	7199	-0.11	-39.1	47.7	0.8	gp4a
PC-3p-148_15047	TGTCTGAGGGTCGTT	AAVX01133698.1	7450	7029	-0.08	-26.2	60.7	0.7	gp4a
PC-5p-692_2993	AAGGTCCAACCTCATATGTCC	AAVX01329176.1	1874	3792	1.02	-41.9	44.8	0.9	gp4a
PC-3p-725_2837	TGTGCAAATCCACGCAAAACTG	AAVX01075480.1	2045	2512	0.3	-33.3	49.4	0.9	gp4a
PC-3p-1173_1640	CGACAACAGTTGGTAGGCTATC	AAVX01193435.1	998	1517	0.6	-45.6	52.1	0.9	gp4a
PC-3p-1058_1816	AGCTACATCTGGTTACTGGGTCT	AAVX01067207.1	1581	1123	-0.49	-45	46.9	1	gp4a
PC-5p-1900_1030	AGGCGGAGACTGGAGCAATTGCT	AAVX01075480.1	844	830	-0.03	-37.4	55.7	0.8	gp4a
PC-5p-2365_839	CAAAGTGCTGTTAGTGCAGGTAG	AAVX01140907.1	792	819	0.05	-40.4	49.5	0.9	gp4a
PC-5p-1275_1521	AAACCGTTACCATTACTTGT	AAVX01451505.1	320	804	1.33	-30.8	43.8	1	gp4a
PC-5p-1275_1521	AAACCGTTACCATTACTTGT	AAVX01465249.1				-30.8	43.8	1	gp4a
PC-5p-3907_519	AGGACTTAGCTAACTCTGTGAACA	AAVX01257813.1	759	685	-0.15	-42.8	50.5	0.9	gp4a
PC-3p-1960_1003	CAGGCTGGTTAGATGGTTGTCT	AAVX01070382.1	593	610	0.04	-39.9	51.7	0.9	gp4a
PC-3p-1505_1300	CTATACAATCTACTGTCTTTCT	AAVX01108779.1	668	600	-0.15	-35.3	42.2	0.9	gp4a
PC-3p-6305_324	ACTGCAGAACAATCACTTTCA	AAVX01072278.1	425	406	-0.07	-39.1	47.7	0.8	gp4a
PC-5p-3472_580	TGTAAACATCCTACACTCAGCTT	AAVX01020176.1	339	338	0	-30.8	46.2	0.7	gp4a
PC-3p-3617_561	ACCATCGACCGTTGATTGTACCT	AAVX01605662.1	295	250	-0.24	-34.4	47.3	0.8	gp4a
PC-5p-6260_326	TAGAGGTAGTAGGTTGCATAGT	AAVX01008163.1	209	236	0.17	-44	50.6	1	gp4a
PC-3p-8545_240	TTCACAGTGGCTAAGTTCCGAA	AAVX01257813.1	194	132	-0.56	-42.8	50.5	0.9	gp4a
PC-3p-23893_72	CTTTCAGTTAGATGTTTATGTT	AAVX01239023.1	65	97	0.59	-18.9	26.9	1	gp4a
PC-5p-22042_80	TGCTCAGTAGCTAGTGTAGGAT	AAVX01067207.1	73	84	0.21	-45	46.9	1	gp4a
PC-5p-9903_206	TAGCAGCACATCATGGTTTGC	AAVX01576107.1	52	74	0.49	-30.7	39.1	0.9	gp4a
PC-5p-9903_206	TAGCAGCACATCATGGTTTGC	AAVX01576111.1				-30.7	39.1	0.9	gp4a
PC-5p-34134_42	CAAAGTCGGTATGAGCAGT	AAVX01066510.1	11	42	1.89	-28.6	41.7	1	gp4a
PC-3p-40185_32	AGCTCGCTGAACAATGAATGC	AAVX01605662.1	49	42	-0.21	-31.4	45.9	0.8	gp4a
PC-3p-26389_63	TACCAGGAGCAGTAGGCTT	AAVX01564433.1	63	40	-0.67	-18	42.9	0.7	gp4a
PC-5p-36937_37	ACCCTATCGATATTGCCTCTGC	AAVX01021344.1	33	34	0.07	-49.4	45.3	1.1	gp4a
PC-3p-47036_24	TTCCTCTTCTTTCCACCA	AAVX01012953.1	30	28	-0.1	-18.1	39.4	0.7	gp4a
PC-5p-89285_8	AGGCAGTGTAACGTTAGCTGGT	AAVX01082942.1	11	18	0.69	-39.2	47.8	0.9	gp4a
PC-3p-145410_4	CGAGGAGGAGAAGAGGA	AAVX01518587.1	1	17	4.49	-22.3	48.5	0.7	gp4a
PC-3p-87599_8	TTCAGTCATTGTTTTGGGTGGA	AAVX01495882.1	12	16	0.38	-33.3	46.2	0.9	gp4a
PC-5p-54672_19	TGTGCCTACTGAGCTGATAAC	AAVX01198958.1	16	14	-0.14	-45.5	48.4	1	gp4a
PC-5p-50954_21	ACCCTGTAGATCCGAATTTGTGTT	AAVX01627291.1	12	13	0.12	-37.4	41.9	1	gp4a
PC-3p-83376_9	TCTCTCTCTCTGAAAC	AAVX01180120.1	11	11	-0.01	-35.1	49.5	0.7	gp4a
PC-5p-60108_16	TAGCAGCACATAATGGTTTGTGA	AAVX01075355.1	7	9	0.43	-35.2	40.6	0.9	gp4a
PC-5p-39375_33	GGTGCAGTGCTGCATCTCTGGTT	AAVX01064725.1	23	9	-1.31	-39.9	50.6	0.9	gp4a
PC-5p-90629_8	TGACTCTAGTCTGAC	AAVX01414293.1	11	9	-0.21	-26.7	50	0.8	gp4a
PC-5p-101047_6	GATGTCGGTAAACCAC	AAVX01232065.1	1	9	3.6	-38.7	56.3	0.7	gp4a
PC-5p-424336_2	CTGTGAATACTGTAGA	AAVX01029546.1	1	8	3.38	-16.1	31.9	0.7	gp4a
PC-3p-402253_2	GTGGGACTGGGCCACACT	AAVX01019235.1	1	8	3.38	-30.1	45.1	0.7	gp4a
PC-3p-166602_3	ATGTGGTCTCCTCTACAC	AAVX01250726.1	1	7	3.12	-40.6	50.6	0.9	gp4a
PC-3p-197345_3	AGGGATTGTGGGTTCGT	AAVX01289095.1	0	7	12.68	-20	47.6	0.7	gp4a
PC-5p-369556_2	TGTGTGCAATTCTGGTCTC	AAVX01018391.1	3	7	1.12	-24.2	47.3	0.7	gp4a
PC-5p-66170_13	TTAGGGTCACACCCACACTGGGA	AAVX01108779.1	8	5	-0.67	-35.3	42.2	0.9	gp4a
PC-5p-98643_7	AGGGAACAATGAAAAACAT	AAVX01465393.1	3	5	0.79	-16.7	30.6	0.8	gp4a
PC-3p-103501_6	TTTTTGCACTGTACATTCC	AAVX01040713.1	3	5	0.79	-22.6	35.3	0.8	gp4a
PC-5p-208550_3	CAATGTGAAATGGTGCAG	AAVX01090759.1	1	5	2.79	-18.6	32.1	0.7	gp4a
PC-3p-481044_2	TGAATGGATGAGGATCT	AAVX01317615.1	1	5	2.79	-19.9	39.2	0.7	gp4a
PC-5p-945425_1	GAAGTCTGTTTTCTGTCAA	AAVX01093061.1	2	4	1.38	-18.2	24.1	1	gp4a
PC-5p-119566_5	ACCCTGTAGAACCGAATTTGTGTT	AAVX01239926.1	4	4	0.06	-37	41.1	1	gp4a
PC-3p-82416_9	CAAATTCGTATCTAGGGGAG	AAVX01627291.1	10	4	-1.32	-37.4	41.9	1	gp4a
PC-3p-108991_6	CCAATATTACTTGTGCTGCTGC	AAVX01576107.1	3	4	0.21	-42.7	43.9	1	gp4a
PC-3p-108991_6	CCAATATTACTTGTGCTGCTGC	AAVX01576111.1				-42.7	43.9	1	gp4a
PC-5p-149668_4	AGTTTTGCTGGCTTTGCAG	AAVX01075480.1	2	4	1.38	-33.3	49.4	0.9	gp4a
PC-3p-270026_2	ATGAACTCACTTGGT	AAVX01067450.1	6	4	-0.62	-19.6	42.9	0.7	gp4a
PC-3p-186337_3	CACGTCTGTCTCAACCTT	AAVX01310208.1	0	4	11.95	-24.4	55.9	0.7	gp4a
PC-3p-706632_1	TGGATGTTGCCTGACCT	AAVX01092985.1	0	4	11.95	-27.9	48.8	0.7	gp4a
PC-3p-182880_3	GAGCTTTACTCTGTATCTGAC	AAVX01074092.1	3	4	0.38	-40.9	52.1	0.7	gp4a
PC-5p-492459_2	CATACTTTTTCTGCATGAA	AAVX01230832.1	0	3	11.36	-31.2	32.9	1.4	gp4a
PC-3p-2621664_1	CTGGACCCGAAACGTTGACTC	AAVX01040504.1	0	3	2.79	-52	44.9	1.2	gp4a
PC-3p-2621664_1	CTGGACCCGAAACGTTGACTC	AAVX01002664.1				-50.5	50	1.1	gp4a
PC-5p-299004_2	ATTGTGAGGATTGTGA	AAVX01062020.1	3	3	-0.21	-17.4	27.4	1	gp4a
PC-3p-1536088_1	GTTGACAAAGTAACAGGAAG	AAVX01059341.1	2	3	0.79	-18.6	29.2	1	gp4a
PC-3p-1917863_1	CATTGGACCTGAAACGTTAACTC	AAVX01037776.1	0	3	11.36	-30.9	40.8	1	gp4a
PC-3p-2303265_1	TGACTTCTGTTTTTGTTTCTA	AAVX01042936.1	0	3	11.36	-42.7	36.8	1	gp4a
PC-3p-325626_2	TCATGTCTGACAAATCTAT	AAVX01161701.1	1	3	1.53	-23.4	33.8	0.9	gp4a
PC-3p-317844_2	GAGAAACACTGTGACACT	AAVX01538104.1	0	3	11.36	-15.9	33.3	0.8	gp4a
PC-3p-2331652_1	GCTATGAGGACTGAGT	AAVX01054513.1	2	3	0.79	-19	40.3	0.8	gp4a
PC-3p-135540_4	ATGTGTTCTGAAGGATAA	AAVX01072339.1	2	3	0.79	-19.1	32.9	0.8	gp4a
PC-5p-1393520_1	GTAGCATCTGTGGAGA	AAVX01114168.1	1	3	1.79	-22.6	41.2	0.8	gp4a
PC-3p-489712_2	GCGCTGTAATGTTCTATG	AAVX01001239.1	3	3	-0.01	-25.7	54.1	0.8	gp4a
PC-5p-3102679_1	CAGAGGCATGACTTTGG	AAVX01062145.1	0	3	11.36	-26.3	43	0.8	gp4a
PC-5p-312801_2	AGTGTAGGCAGATGACAG	AAVX01134348.1	0	3	11.36	-27.1	43.2	0.8	gp4a
PC-3p-867888_1	TGACTGATGGCAGAGGGAA	AAVX01285502.1	0	3	11.36	-32.3	46.1	0.8	gp4a
PC-3p-371439_2	GAGGGAGCTTTACTCTGC	AAVX01069194.1	0	3	11.36	-33.9	50	0.8	gp4a
PC-5p-1097124_1	TCTGTCTCTCTCTCTCTGTGCCT	AAVX01033877.1	0	3	11.36	-34.2	62.3	0.8	gp4a
PC-5p-2450690_1	CTGTGTGGGTGCTGTCTGA	AAVX01088253.1	0	3	11.36	-36.1	55.6	0.8	gp4a
PC-3p-448137_2	TTGTTGTAGTTGGTC	AAVX01508986.1	0	3	11.36	-42	46.6	0.8	gp4a
PC-5p-463141_2	TGGATGTTATCTACC	AAVX01532636.1	2	3	0.79	-16.1	38.1	0.7	gp4a
PC-5p-500345_2	GTCTGAGAGAAAACCATT	AAVX01074315.1	0	3	11.36	-16.3	42.1	0.7	gp4a
PC-3p-130674_4	TTTTAGGAGCTCTGCAA	AAVX01083188.1	5	3	-1.01	-17.6	29.6	0.7	gp4a
PC-5p-1196709_1	AGACACAATGAGCTGAAT	AAVX01083164.1	0	3	11.36	-18.3	44.1	0.7	gp4a
PC-5p-1140712_1	AAAACTGTGGAAAATGCCT	AAVX01066162.1	0	3	11.36	-19.2	28.3	0.7	gp4a
PC-5p-464037_2	GTATTGCGCTGAGGTGAA	AAVX01045739.1	0	3	11.36	-20.1	34.6	0.7	gp4a
PC-5p-427438_2	AGGGAATGGGTTTGA	AAVX01011628.1	0	3	11.36	-20.2	43.1	0.7	gp4a
PC-3p-69866_12	TGTTCTTGTAGTTAC	AAVX01285655.1	1	3	1.21	-20.4	44.8	0.7	gp4a
PC-3p-69866_12	TGTTCTTGTAGTTAC	AAVX01288454.1				-20.4	44.8	0.7	gp4a
PC-3p-69866_12	TGTTCTTGTAGTTAC	AAVX01635466.1				-20.4	44.8	0.7	gp4a
PC-3p-69866_12	TGTTCTTGTAGTTAC	AAVX01197100.1				-34.5	46.4	0.7	gp4a
PC-3p-69866_12	TGTTCTTGTAGTTAC	AAVX01554915.1				-34.5	46.4	0.7	gp4a
PC-5p-2383893_1	TGGGAAGTGTGTAGA	AAVX01046999.1	0	3	11.36	-20.9	39.7	0.7	gp4a
PC-5p-2081481_1	GCAACTTGGACCTTAACC	AAVX01108778.1	0	3	11.36	-21.4	50.8	0.7	gp4a
PC-3p-2646270_1	GAGGCAGTCAGGATATTTGT	AAVX01016823.1	0	3	11.36	-22.1	47.6	0.7	gp4a
PC-5p-708966_1	AAATAGTTGCTTTGGT	AAVX01109530.1	0	3	11.36	-22.6	41.3	0.7	gp4a
PC-5p-1563014_1	TGGTGCTAAATCATTC	AAVX01124661.1	1	3	1.79	-22.8	37.2	0.7	gp4a
PC-5p-129455_4	CTTTCTTTTCAAATGA	AAVX01064151.1	2	3	0.79	-23.9	42	0.7	gp4a
PC-5p-2625434_1	GTGTTTTGGAGATTTTGT	AAVX01070866.1	0	3	11.36	-27.1	39.4	0.7	gp4a
PC-5p-3072352_1	GTGTGACTGTGACAGTGT	AAVX01213914.1	0	3	11.36	-27.5	50	0.7	gp4a
PC-5p-1169076_1	GTGTGGGACTGGAAC	AAVX01159200.1	0	3	11.36	-27.7	54.7	0.7	gp4a
PC-3p-295386_2	GTTTCTCGAGGGAAGGCT	AAVX01340307.1	0	3	11.36	-28.2	50.6	0.7	gp4a
PC-3p-995242_1	GACAGTACTCCCTTCAGACAG	AAVX01578483.1	2	3	0.21	-30.7	48.3	0.7	gp4a
PC-5p-789758_1	CTGGAGCAGGTGGGACTT	AAVX01053449.1	0	3	11.36	-31	53.1	0.7	gp4a
PC-5p-684553_1	GTGTGTGTGTGTGGGAGC	AAVX01052379.1	0	3	11.36	-40.2	47	0.7	gp4a
PC-3p-2379903_1	TGTGTCTCTCTGTGTGTGTGTC	AAVX01246108.1	0	3	11.36	-45.9	52	0.7	gp4a
PC-5p-178860_3	TTTGTTTCTGATTTCCAGCATC	AAVX01254764.1	2	2	0.31	-17.7	32.4	0.8	gp4a
PC-3p-407957_2	ATTGAACTCAACTGAATTG	AAVX01183718.1	2	1	-0.21	-44.2	43.2	1.3	gp4a
PC-3p-356714_2	CTGTCACTGTGCTGCCT	AAVX01030917.1	2	1	-0.21	-37.4	58.3	1.1	gp4a
PC-5p-2627156_1	ATTGCACACTACCAAGTTGC	AAVX01589492.1	2	1	-0.79	-54.5	50	1.1	gp4a
PC-5p-500628_2	CAATGGTCTGTTTCCGTGCTGT	AAVX01084872.1	2	1	-0.79	-18.5	29.2	0.9	gp4a
PC-5p-114183_5	TAGGTCTGTATCTTC	AAVX01160840.1	4	1	-1.53	-16.5	33.3	0.8	gp4a
PC-5p-883250_1	CTGAGCTGTAGGTTT	AAVX01051969.1	2	1	-0.21	-22.9	36.8	0.8	gp4a
PC-3p-2167970_1	CCAATGACTGATTAGTATG	AAVX01636812.1	2	1	-0.21	-26.1	50.8	0.8	gp4a
PC-5p-2379333_1	TGCCTGTTGTGCTGTGAA	AAVX01157415.1	2	1	-0.21	-31.6	46.3	0.8	gp4a
PC-5p-2864497_1	CGCAGCGGGTCGGGCAGCATC	AAVX01574218.1	2	1	-0.79	-35.1	57.5	0.8	gp4a
PC-3p-213593_3	GAATGTTTTTGAGGA	AAVX01026634.1	2	1	-0.79	-17.9	37.7	0.7	gp4a
PC-5p-1590559_1	GTTGCTGGTGTGACTTCCT	AAVX01096658.1	2	1	-0.21	-19.6	45.8	0.7	gp4a
PC-5p-80566_9	GCCCGGATAGCTCAGTCGGC	AAVX01141767.1	3	1	-1.21	-25.9	45.2	0.7	gp4a
PC-5p-80566_9	GCCCGGATAGCTCAGTCGGC	AAVX01197671.1				-25.9	45.2	0.7	gp4a
PC-3p-460147_2	GTGTCTCACTGTGTGG	AAVX01539358.1	2	1	-1.21	-27.5	48.8	0.7	gp4a
PC-3p-441817_2	CACTGAGCTCTCTCTCC	AAVX01090148.1	2	1	-1.21	-30.1	52.5	0.7	gp4a
PC-3p-1718743_1	TTGATGGACTGAATGGCCT	AAVX01155129.1	2	1	-0.21	-30.3	41.8	0.7	gp4a
PC-3p-460147_2	GTGTCTCACTGTGTGG	AAVX01213864.1	2	1	-1.21	-35.1	46.6	0.7	gp4a
PC-5p-2698355_1	CTCGCTCTCTCTCTCTCGCGCTCTCTCT	AAVX01189105.1	2	1	-1.53	-44.2	65.3	0.7	gp4a
PC-3p-2690289_1	ATAAATGACTTGGATGAAGAAA	AAVX01079067.1	2	0	-10.57	-19.9	20.8	1.3	gp4a
PC-5p-467643_2	AGCAGGTCAGGCAGCATCTAAG	AAVX01562566.1	2	0	-10.57	-54	48.8	1.3	gp4a
PC-3p-334707_2	TGTTGTGATTGTTGTCCTT	AAVX01439374.1	2	0	-10.57	-41	44.7	1.1	gp4a
PC-3p-519126_2	ATTTTTATTTTGTTCTGCT	AAVX01076015.1	2	0	-10.57	-20	28	1	gp4a
PC-5p-1679924_1	GAAGATGATGAGGATGAT	AAVX01009941.1	2	0	-10.57	-32.4	40.3	1	gp4a
PC-5p-219253_3	CATTTCAGGTCAATTACC	AAVX01049741.1	2	0	-11.15	-34.5	37.9	1	gp4a
PC-5p-1342481_1	TTAGCAGCACGTAAATATTGGAGT	AAVX01075355.1	2	0	-10.57	-42	45.3	1	gp4a
PC-3p-643493_1	TGTGAGAGTGCTGAGCCTG	AAVX01455137.1	2	0	-10.57	-48.3	52.2	1	gp4a
PC-5p-344600_2	AAAAAATCTGTCAGTCTCA	AAVX01048657.1	2	0	-10.57	-20.5	35.9	0.9	gp4a
PC-5p-496949_2	GCATAAAACTAATGAGTGAAT	AAVX01049047.1	2	0	-10.57	-22	28.1	0.9	gp4a
PC-5p-2063085_1	ATGGTAAAGAAGAGGTGAA	AAVX01066380.1	2	0	-10.57	-22.3	32	0.9	gp4a
PC-3p-177119_3	ATTCTAATTGTCATCACTCAG	AAVX01256001.1	3	0	-11.57	-23.5	39.1	0.9	gp4a
PC-3p-838299_1	TGTGTGTGTAGTGCTCTG	AAVX01033671.1	2	0	-10.57	-25.8	46.8	0.9	gp4a
PC-5p-594960_1	TGTGTGTATCTGTGTCTGT	AAVX01236844.1	2	0	-10.57	-26.6	34.5	0.9	gp4a
PC-5p-1855176_1	TTGGACAGGATGGTAAAG	AAVX01251806.1	2	0	-10.57	-28.3	46.4	0.9	gp4a
PC-5p-1688129_1	CTGCTGCACCTCTCTCTC	AAVX01107893.1	2	0	-10.57	-51	64	0.9	gp4a
PC-5p-341687_2	CTTTGATCTCCACATGAAG	AAVX01171372.1	2	0	-10.57	-17.6	27.1	0.8	gp4a
PC-5p-348716_2	CGTGAGCTGGGGTTAGAC	AAVX01304765.1	3	0	-11.57	-18.7	41.4	0.8	gp4a
PC-3p-785319_1	TTGTAGAATTAAAGCACA	AAVX01086298.1	2	0	-10.57	-22.7	36.4	0.8	gp4a
PC-3p-2796353_1	TGTGTATCTGTGTGAGTGTGTG	AAVX01107299.1	2	0	-10.57	-25.3	44.6	0.8	gp4a
PC-5p-271704_2	GAGGATTCTGATGAAGAT	AAVX01270718.1	2	0	-10.57	-26.1	38.8	0.8	gp4a
PC-3p-533670_1	TGTTTATTTGGGGATATTGT	AAVX01089098.1	2	0	-10.57	-27.4	44.4	0.8	gp4a
PC-3p-452206_2	TCTCTGTGTGTGTCCCTG	AAVX01304241.1	2	0	-10.57	-28	46.8	0.8	gp4a
PC-5p-566439_1	TATTGAATGTGGCAC	AAVX01267598.1	2	0	-11.15	-28.1	50	0.8	gp4a
PC-3p-625068_1	CTCACTCTCTCCGTGTC	AAVX01076636.1	2	0	-10.57	-44.6	55.7	0.8	gp4a
PC-3p-495717_2	GAACAGGAGTAGGCCATTTGG	AAVX01025314.1	2	0	-10.57	-45.3	56.7	0.8	gp4a
PC-5p-473979_2	CTTTGTAGGCTGGATTGAA	AAVX01006543.1	2	0	-10.57	-17.1	40.6	0.7	gp4a
PC-3p-1396833_1	AGGGAGAAATGGCTTTGGA	AAVX01034275.1	2	0	-11.15	-18.6	46.4	0.7	gp4a
PC-3p-309475_2	GAAGCCTGTTCTGCCATT	AAVX01074134.1	2	0	-10.57	-19.2	46.6	0.7	gp4a
PC-3p-437026_2	AAGAGTAGGGAAGTCTGACTGC	AAVX01373022.1	2	0	-10.57	-19.4	45.2	0.7	gp4a
PC-3p-1658642_1	TGTTTGAAACTTGGGC	AAVX01010284.1	2	0	-10.57	-19.5	30.6	0.7	gp4a
PC-5p-197429_3	TTGAGTCAAATGCTGCAC	AAVX01379166.1	2	0	-11.15	-22.3	35.3	0.7	gp4a
PC-5p-590488_1	AAGCTTTTGGATGAACAGAA	AAVX01341549.1	2	0	-10.57	-23.8	43.4	0.7	gp4a
PC-3p-1884250_1	TTGGACTCCTCTGAACT	AAVX01165361.1	2	0	-11.15	-24.5	45.5	0.7	gp4a
PC-5p-372914_2	AGGATTATGATATTGTGGTG	AAVX01057452.1	2	0	-10.57	-24.7	37.4	0.7	gp4a
PC-3p-461729_2	AAATGGTTGATCTTTGATT	AAVX01250029.1	2	0	-10.57	-24.8	30	0.7	gp4a
PC-3p-2670132_1	GGGACTGTTTCTGTGC	AAVX01580561.1	2	0	-10.57	-26	48	0.7	gp4a
PC-3p-528151_1	TGTGAAGGTGACTGGAGTC	AAVX01024458.1	2	0	-10.57	-26.9	41.9	0.7	gp4a
PC-3p-523325_1	ATGAACCAGTGTCTGAAC	AAVX01476521.1	2	0	-10.57	-27.1	53.4	0.7	gp4a
PC-5p-2819908_1	GTATGCATGTGTGTCTGTGTG	AAVX01275886.1	2	0	-10.57	-27.6	38.5	0.7	gp4a
PC-3p-1047121_1	GTGTGTGAGTGTGGTGTGC	AAVX01198543.1	2	0	-10.57	-29	55.3	0.7	gp4a
PC-3p-2114979_1	CCTCTCTCCATCTCTCTCTCTC	AAVX01241370.1	2	0	-10.57	-30.2	60.5	0.7	gp4a
PC-5p-1298548_1	TAAATGACTTGGATGAAA	AAVX01496185.1	2	0	-10.57	-31.7	41	0.7	gp4a
PC-3p-322074_2	GTGAGCTGTGTCCCCTGGG	AAVX01514979.1	2	0	-10.57	-32.5	53.3	0.7	gp4a
PC-3p-1860228_1	CGTACCGTGAGTAATAATGCACA	AAVX01058805.1	2	0	-10.57	-34.2	46.5	0.7	gp4a
PC-5p-480254_2	GCATGGACTGGTTGGACCGA	AAVX01062244.1	4	0	-11.89	-38.8	38	0.7	gp4a
PC-5p-725697_1	CCGTGTCTCTCTCTCTCT	AAVX01314760.1	2	0	-10.57	-38.9	60.7	0.7	gp4a
PC-3p-286023_2	ACTCACCTTCTTCCCCCTC	AAVX01002717.1	2	0	-10.57	-41.1	53.1	0.7	gp4a
PC-5p-1003447_1	CTCTCTCTCTCTCGCGCGCC	AAVX01435132.1	2	0	-10.57	-47.1	72.8	0.7	gp4a

## Sheet: table2
Analysis of miRNA gene clusters
cluster#	miR_name	genomeID	start	end	same pre-miRNA
1	fru-miR-199_R-1	AAVX01256932.1	297	390	√
	ola-miR-199a-3p	AAVX01256932.1	297	390
2	fru-miR-30d_R-6	AAVX01365666.1	202	267	√
	ola-miR-30d-3p_R-3_1ss10TA	AAVX01365666.1	202	267
3	xtr-miR-125b	AAVX01166684.1	1	84	√
	hsa-miR-125b-1-3p	AAVX01166684.1	1	84
4	fru-miR-24-3p_R-2	AAVX01198958.1	117	189
	ola-miR-24b-5p_R-2	AAVX01198958.1	60	199
	PC-5p-54672_19	AAVX01198958.1	58	198
	fru-mir-24-1-p5_2ss13AG17GA	AAVX01198958.1	117	189
5	fru-miR-26	AAVX01037532.1	3549	3614	√
	hsa-miR-26a-1-3p_R-6_1ss11GA	AAVX01037532.1	3549	3614
6	fru-miR-181a_R-1	AAVX01605662.1	385	452
	fru-miR-181b_R+1	AAVX01605662.1	170	261
	PC-3p-3617_561	AAVX01605662.1	327	469
	PC-3p-40185_32	AAVX01605662.1	127	267
7	ola-miR-143_R+1	AAVX01064725.1	2042	2104
	PC-3p-7_141620	AAVX01064725.1	2024	2165
	PC-5p-39375_33	AAVX01064725.1	2024	2165
	hsa-miR-143-5p_R-1	AAVX01064725.1	2042	2104
8	hsa-miR-10a-3p_R-3	AAVX01627291.1	593	685
	PC-5p-50954_21	AAVX01627291.1	587	730
	PC-3p-82416_9	AAVX01627291.1	587	730
	hsa-miR-10a-5p_R-1	AAVX01627291.1	593	685
9	fru-let-7e_2ss12AG16AT	AAVX01108779.1	804	890
	PC-3p-1505_1300	AAVX01108779.1	749	890
	PC-5p-66170_13	AAVX01108779.1	749	890
10	fru-miR-7_R+3	AAVX01096348.1	604	701	√
	hsa-miR-7-1-3p_R-1_1ss17GC	AAVX01096348.1	604	701
11	fru-miR-126	AAVX01058805.1	2080	2145
	ola-miR-126-3p_R+2	AAVX01058805.1	2019	2160
	PC-3p-1860228_1	AAVX01058805.1	2017	2159
	xtr-miR-126*	AAVX01058805.1	2080	2145
12	fru-mir-200a-p5_2ss9CT10CA	AAVX01056733.1	894	968	√
	fru-miR-200a	AAVX01056733.1	894	968
13	fru-miR-23b_R-1	AAVX01114775.1	754	825
	fru-miR-27b_R-1	AAVX01114775.1	501	582
	hsa-miR-27b-5p_L+1	AAVX01114775.1	501	582
14	ola-miR-1388-3p_R+5	AAVX01069536.1	2367	2430
	ola-miR-1388-5p_R-1	AAVX01069536.1	2367	2430
	PC-5p-16_103922	AAVX01069536.1	2307	2447
15	fru-miR-140	AAVX01038725.1	2944	3027	√
	ola-miR-140-3p_L+1R+1	AAVX01038725.1	2944	3027
16	xtr-miR-30a-3p	AAVX01474940.1	153	219	√
	xtr-miR-30a-5p_R-6	AAVX01474940.1	153	219
17	fru-miR-107_R-1	AAVX01541574.1	692	769	√
	mmu-miR-107-5p	AAVX01541574.1	692	769
18	fru-miR-9_R-2	AAVX01065791.1	2122	2187	√
	ola-miR-9a-3p_L-1R+2	AAVX01065791.1	2122	2187
19	hsa-miR-454-3p	AAVX01021344.1	1971	2035
	PC-5p-36937_37	AAVX01021344.1	1911	2052
20	fru-let-7b_R-7	AAVX01031590.1	1653	1736	√
	hsa-let-7b-3p_R-1	AAVX01031590.1	1653	1736
21	ola-miR-29b_R-2	AAVX01078214.1	522	596
	xtr-miR-29c_R+2	AAVX01078214.1	100	171
22	fru-miR-133_L-1R+1	AAVX01020289.1	2709	2804	√
	ola-miR-133-5p_R-3	AAVX01020289.1	2709	2804
23	ola-miR-144_L-1R+2_1ss12TA	AAVX01587350.1	63	125	√
	fru-miR-144_R-1	AAVX01587350.1	63	125
24	fru-miR-129_R-1	AAVX01173776.1	403	477
	hsa-miR-129-1-3p_1ss20TC	AAVX01173776.1	403	477
	fru-miR-30b	AAVX01020176.1	2208	2349
	PC-5p-3472_580	AAVX01020176.1	2207	2349
25	hsa-let-7d-5p	AAVX01008163.1	74	215	√
	PC-5p-6260_326	AAVX01008163.1	73	214
26	xtr-miR-15a_R-1	AAVX01075355.1	1101	1241
	PC-5p-60108_16	AAVX01075355.1	1099	1241
	PC-5p-1342481_1	AAVX01075355.1	903	1046
27	fru-miR-92_R-2	AAVX01075480.1	474	613
	fru-miR-25_R-3	AAVX01075480.1	186	324
	PC-5p-1900_1030	AAVX01075480.1	220	362
	PC-3p-189_12178	AAVX01075480.1	472	613
	PC-5p-149668_4	AAVX01075480.1	1522	1663
	PC-3p-725_2837	AAVX01075480.1	1522	1663
28	mmu-mir-5097-p3	AAVX01141767.1	2178	2316
	PC-5p-80566_9	AAVX01141767.1	2120	2259
29	PC-5p-80566_9	AAVX01197671.1	158	297
	mmu-mir-5097-p3	AAVX01197671.1	216	354
30	PC-5p-93_24510	AAVX01239023.1	355	498	√
	PC-3p-23893_72	AAVX01239023.1	355	498
31	PC-3p-8545_240	AAVX01257813.1	514	657
	PC-5p-3907_519	AAVX01257813.1	514	657
	ola-miR-27d-3p_R+2	AAVX01257813.1	473	612
32	PC-5p-290_7683	AAVX01072278.1	70	212	√
	PC-3p-6305_324	AAVX01072278.1	70	212
33	PC-5p-9903_206	AAVX01576107.1	108	248
	PC-3p-108991_6	AAVX01576107.1	317	458
34	PC-5p-9903_206	AAVX01576111.1	240	380
	PC-3p-108991_6	AAVX01576111.1	449	590

## Sheet: table3
	miRNA and its target genes related to liver regeneration
miRNA	target gene	cell proliferation	growth
xtr-miR-34a_R-1	gi|209426323|gb|GE329160.1|GE329160	＊
	gi|209426408|gb|GE328089.1|GE328089	＊
	gi|209425650|gb|GE327521.1|GE327521		＊
	gi|209426846|gb|GE328191.1|GE328191		＊
fru-miR-181a_R-1	gi|209425780|gb|GE329065.1|GE329065	＊
	gi|209426323|gb|GE329160.1|GE329160	＊
ola-miR-140-3p_L+1R+1	gi|209426323|gb|GE329160.1|GE329160	＊
	gi|209426846|gb|GE328191.1|GE328191		＊
fru-miR-122_R+1	gi|209425573|gb|GE328004.1|GE328004	＊
	gi|209426408|gb|GE328089.1|GE328089	＊
	gi|209426448|gb|GE328129.1|GE328129	＊
	gi|209425650|gb|GE327521.1|GE327521		＊
fru-miR-203	gi|209425573|gb|GE328004.1|GE328004	＊
fru-miR-140	gi|209425573|gb|GE328004.1|GE328004	＊
	gi|209426846|gb|GE328191.1|GE328191	＊
	gi|261873421|gb|GU014394.1|		＊
ola-miR-199a-3p	gi|209425573|gb|GE328004.1|GE328004	＊
fru-miR-196a-1	gi|209426408|gb|GE328089.1|GE328089	＊
fru-miR-204a	gi|209426408|gb|GE328089.1|GE328089	＊
	gi|261873421|gb|GU014394.1|		＊
hsa-miR-143-5p_R-1	gi|209426408|gb|GE328089.1|GE328089	＊
	gi|209426926|gb|GE327263.1|GE327263		＊
	gi|261873421|gb|GU014394.1|		＊
	gi|209425650|gb|GE327521.1|GE327521		＊
	gi|209426846|gb|GE328191.1|GE328191		＊
mmu-miR-107-5p	gi|209426408|gb|GE328089.1|GE328089	＊
fru-miR-27b_R-1	gi|209426408|gb|GE328089.1|GE328089	＊
	gi|209426448|gb|GE328129.1|GE328129	＊
fru-miR-9_R-2	gi|209426408|gb|GE328089.1|GE328089	＊
hsa-miR-103a-2-5p_R+1	gi|209426408|gb|GE328089.1|GE328089	＊
ola-miR-1388-5p_R-1	gi|209426408|gb|GE328089.1|GE328089	＊
	gi|209425780|gb|GE329065.1|GE329065	＊
fru-miR-24-3p_R-2	gi|209426408|gb|GE328089.1|GE328089	＊
	gi|209425780|gb|GE329065.1|GE329065	＊
	gi|209426846|gb|GE328191.1|GE328191		＊
fru-miR-129_R-1	gi|209426408|gb|GE328089.1|GE328089	＊
ola-miR-24b-5p_R-2	gi|209426408|gb|GE328089.1|GE328089	＊
fru-miR-133_L-1R+1	gi|209425780|gb|GE329065.1|GE329065	＊
	gi|209426448|gb|GE328129.1|GE328129	＊
	gi|209426926|gb|GE327263.1|GE327263		＊
	gi|209426846|gb|GE328191.1|GE328191		＊
	gi|261873421|gb|GU014394.1|		＊
xtr-miR-301	gi|209425780|gb|GE329065.1|GE329065	＊
fru-mir-200a-p5_2ss9CT10CA	gi|209425780|gb|GE329065.1|GE329065	＊
fru-mir-24-1-p5_2ss13AG17GA	gi|209425780|gb|GE329065.1|GE329065	＊
fru-miR-181b_R+1	gi|209425780|gb|GE329065.1|GE329065	＊
	gi|209426448|gb|GE328129.1|GE328129	＊
	gi|209426926|gb|GE327263.1|GE327263		＊
	gi|261873421|gb|GU014394.1|		＊
ola-miR-1388-3p_R+5	gi|209425780|gb|GE329065.1|GE329065	＊
	gi|209426448|gb|GE328129.1|GE328129	＊
	gi|209425650|gb|GE327521.1|GE327521		＊
hsa-miR-205-5p_R+1	gi|209425780|gb|GE329065.1|GE329065	＊
	gi|209426448|gb|GE328129.1|GE328129	＊
	gi|209426926|gb|GE327263.1|GE327263		＊
	gi|261873421|gb|GU014394.1|		＊
	gi|209426846|gb|GE328191.1|GE328191		＊
fru-miR-26	gi|209425780|gb|GE329065.1|GE329065	＊
	gi|209426846|gb|GE328191.1|GE328191		＊
hsa-miR-27b-5p_L+1	gi|209426448|gb|GE328129.1|GE328129	＊
hsa-miR-10a-5p_R-1	gi|209426448|gb|GE328129.1|GE328129	＊
xtr-miR-135	gi|209426448|gb|GE328129.1|GE328129	＊
fru-miR-17_R+1	gi|209426926|gb|GE327263.1|GE327263		＊
	gi|261873421|gb|GU014394.1|		＊
fru-miR-199_R-1	gi|209426926|gb|GE327263.1|GE327263		＊
	gi|261873421|gb|GU014394.1|		＊
	gi|298155799|gb|HM021240.1|		＊
fru-miR-142a_L+2R-2	gi|261873421|gb|GU014394.1|		＊
mmu-miR-101b-3p_R+1	gi|261873421|gb|GU014394.1|		＊
hsa-miR-142-3p_R-1	gi|261873421|gb|GU014394.1|		＊
ola-miR-144_L-1R+2_1ss11TA	gi|261873421|gb|GU014394.1|		＊
	gi|298155799|gb|HM021240.1|		＊
fru-let-7e_2ss12AG16AT	gi|261873421|gb|GU014394.1|		＊
	gi|298155799|gb|HM021240.1|		＊
ola-miR-103_R+2	gi|261873421|gb|GU014394.1|		＊
	gi|298155799|gb|HM021240.1|		＊
fru-miR-107_R-1	gi|261873421|gb|GU014394.1|		＊
	gi|298155799|gb|HM021240.1|		＊
hsa-let-7d-5p	gi|298155799|gb|HM021240.1|		＊
	gi|261873421|gb|GU014394.1|		＊
fru-miR-92_R-2	gi|261873421|gb|GU014394.1|		＊
	gi|209425650|gb|GE327521.1|GE327521		＊
	gi|209426846|gb|GE328191.1|GE328191		＊
xtr-miR-125b	gi|261873421|gb|GU014394.1|		＊
	gi|298155799|gb|HM021240.1|		＊
fru-miR-184_R-1	gi|298155799|gb|HM021240.1|		＊
xla-miR-15c_R-2	gi|298155799|gb|HM021240.1|		＊
fru-miR-25_R-3	gi|298155799|gb|HM021240.1|		＊
	gi|209425650|gb|GE327521.1|GE327521
xtr-miR-338_R-1	gi|209425650|gb|GE327521.1|GE327521		＊
fru-miR-23b_R-1	gi|209426846|gb|GE328191.1|GE328191		＊
